# Supplementary material for: OsbZIP18, a Positive Regulator of Serotonin Biosynthesis, Negatively Controls the UV-B Tolerance in Rice
Source: Int J Mol Sci. 2022 Mar 16;23(6):3215. doi: 10.3390/ijms23063215 (PMC8949417; doi:10.3390/ijms23063215)
Supplement: Supplementary file 1 [file ijms-23-03215-s001.zip › Supplementary Tables.xlsx]

## Sheet: Supplementary Table S1
Supplementary Table S1. The primers used in this study.
Primer name	Primer sequence (5'–3')	Use
OsbZIP18-F	attB1-ATGGCGACAACACGCGCATC	Overexpression
OsbZIP18-R	attB2-TAATTATGCCGCCCTGCCGC
P-OsTDC1-F	attB1-TTGTGGAACAATGGATATCCACGG	Promoter_LUC
P-OsTDC1-R	attB2-TCGAGATGAAACTAACTGTCTCAGC
P-OsTDC3-F	attB1-ATTTCATTGCAAAGGCAGACAGATC	Promoter_LUC
P-OsTDC3-R	attB2-TCAGTGGAGGATGACGGTGAAG
p-OsT5H-F	attB1-ATGGAGGAGATGGAGAGATGGA	Promoter_LUC
p-OsT5H-R	attB2-TGCACGTTTGGTCCAAGAAAC
Pr-OsbZIP18-F	CGGGATCCATGCTTCACGCAAGCAGCAA	Protein
Pr-OsbZIP18-R	CGGAATTCCTATTGACCCTCTCCACTAGCAGTG
OsTDC1-F	CCTCCTCCATCTTCTCCCCTCACGACTCCTCCAACGCCCTCCTCCCCACG	EMSA
OsTDC1-R	CGTGGGGAGGAGGGCGTTGGAGGAGTCGTGAGGGGAGAAGATGGAGGAGG
OsTDC3-F	GCATATTATTGCTGATGTAGAGTTACCACGTGCTAAGCTATCGAATTAGT	EMSA
OsTDC3-R	ACTAATTCGATAGCTTAGCACGTGGTAACTCTACATCAGCAATAATATGC
OsT5H-F(G1)	CTTTTGGATCTCTACATTAACTCACGTGTGCTAATGATAGATTAATTAAG	EMSA
OsT5H-R(G1)	CTTAATTAATCTATCATTAGCACACGTGAGTTAATGTAGAGATCCAAAAG
OsT5H-F(G2)	CGTGCTTGGTCGATACGCACTTCACACGTGCCATCTTTCTATCACATTAC	EMSA
OsT5H-R(G2)	GTAATGTGATAGAAAGATGGCACGTGTGAAGTGCGTATCGACCAAGCACG
q-OsbZIP01-F	CAGGGTTGTGGTAGGAATTGA	RT-qPCR
q-OsbZIP01-R	GCGTAGAGTAGAACAGAGAAGAAG
q-OsbZIP18-F	GAACCAGATGCTCAGACAGATAC	RT-qPCR
q-OsbZIP18-R	CTTGCTGTCATCTTCTCCTCTATT
q-OsbZIP48-F	GAAGAAGGCGTACATGAGTGAG	RT-qPCR
q-OsbZIP48-R	CCTAAGCATCTGGTTCTCGTTT
q-OsTDC1-F	TGGACTTCATCTCGGACTACTA	RT-qPCR
q-OsTDC1-R	CCTTCATGGTGACGTCGAA
q-OsTDC3-F	GTCGACTTCGTCTACGACTACTA	RT-qPCR
q-OsTDC3-R	CCTGAGCTCCTTCATAGCAATATC
q-OsT5H-F	CCTAACCGACGACAATCTCAAG	RT-qPCR
q-OsT5H-R	TAGCTCCGTCATCACCCA
Ubiquitin-F	AACCAGCTGAGGCCCAAGA	RT-qPCR
Ubiquitin-R	ACGATTGATTTAACCAGTCCATGA

## Sheet: Supplementary Table S2
Supplementary Table S2. Relative expression level of OsTDC1, OsTDC3, OsT5H, OsbZIP01, OsbZIP18, and OsbZIP48 under control and UV-B radiation.
	OsTDC1				OsTDC3				OsT5H				OsbZIP01				OsbZIP18				OsbZIP48
	Control		UV-B		Control		UV-B		Control		UV-B		Control		UV-B		Control		UV-B		Control		UV-B
Hours	average	std	average	std	average	std	average	std	average	std	average	std	average	std	average	std	average	std	average	std	average	std	average	std
0 h	0.327844	0.244036	0.0603318	0.0024633	1	0.848527	0.848864	0.744408	1	0.154644	0.900598	0.167108	1	0.0393995	0.975287	0.0266392	1	0.164691	1.28783	0.098445	1	0.0331487	1.0121	0.00812037
3 h	0.143369	0.0342209	0.29252	0.0485557	0.0584701	0.00532761	0.126085	0.0454564	4.45919	0.844743	2.61974	0.276679	1.43939	0.0837836	6.67663	0.530299	1.18419	0.0739235	9.49612	0.59238	1.05891	0.199736	4.28835	0.529475
6 h	0.0430141	0.000994937	1.44925	0.488033	0.0621285	0.00196766	0.399982	0.135964	2.88442	0.797552	21.166	2.94906	1.22809	0.095855	2.66521	0.324474	1.0337	0.0368673	4.45018	0.536985	1.10126	0.338928	3.22659	0.254925
12 h	1.32535	0.246561	30.4611	5.63951	3.10106	0.474592	25.7538	1.99236	5.05419	0.42936	16.0645	1.7021	0.829897	0.194825	1.0471	0.0564365	0.862986	0.0216877	2.32979	0.210962	0.934724	0.0381184	1.52645	0.240225
24 h	1	0.279945	21.5824	3.24941	0.264195	0.160335	23.4746	4.38841	3.73124	1.13623	5.45908	1.51744	0.507279	0.0615572	0.316038	0.0322221	0.763279	0.0038117	0.873379	0.196256	0.804072	0.0750145	1.06093	0.0766453
